# Supplementary material for: Metagenomic data of fungal community in Kongsfjorden, Arctic using Illumina next generation sequencing
Source: PubMed Central journal article supplement (PMC6301978; doi:10.1016/j.dib.2018.12.026), 2018-12-13
Supplement: mmc1.pdf [file mmc1.pdf]

# *Conflicts of Interest Statement*

**Journal: Data in Brief**

**Manuscript Title: Metagenomic data of fungal community in Kongsfjorden, Arctic using Illumina next generation sequencing**

The authors whose names are listed immediately below certify that they have NO affiliations with or involvement in any organization or entity with any financial interest (such as honoraria; educational grants; participation in speakers' bureaus; membership, employment, consultancies, stock ownership, or other equity interest; and expert testimony or patent-licensing arrangements), or non-financial interest (such as personal or professional relationships, affiliations, knowledge or beliefs) in the subject matter or materials discussed in this manuscript.

**Author names:**

**Farha Arakkaveettil Kabeer**<sup>1</sup>

**Jabir T**<sup>1</sup>

**Krishnan K. P**<sup>2</sup>

**Mohamed Hatha Abdulla**<sup>1</sup>

**Affiliations:** <sup>1</sup>Department of Marine Biology, Microbiology & Biochemistry, School of Marine Sciences, Cochin University of Science and Technology (CUSAT), Kochi, India.

<sup>2</sup>National Centre for Antarctic and Ocean Research, Headland Sada, Vasco-da-Gama, Goa. 403 804, India.

**This statement is signed by all the authors to indicate agreement that the above information is true and correct**

| Author's name                | Author's signature                                                                 | Date              |
|------------------------------|------------------------------------------------------------------------------------|-------------------|
| Farha Arakkaveettil Kabeer   |   | <b>27/10/18</b>   |
| <b>Jabir T</b>               |   | <b>27/10/18</b>   |
| <b>Krishnan K. P</b>         |   | <b>28/10/2018</b> |
| <b>Mohamed Hatha Abdulla</b> |  | <b>27/10/18</b>   |
